# Supplementary material for: A Data-Efficient Deep Transfer Learning Framework for Methane Super-Emitter Detection in Oil and Gas Fields Using Sentinel-2 Satellite
Source: Copernicus journal article supplement (doi:10.5194/egusphere-2024-2565), 2024-09-03
Supplement: Supplementary file 1 [file egusphere-2024-2565-supplement.pdf]

1 **A Data-Efficient Deep Transfer Learning Framework for Methane Super-Emitter**  
2 **Detection in Oil and Gas Fields Using Sentinel-2 Satellite**

3 Shutao Zhao<sup>1,2</sup>, Yuzhong Zhang<sup>2,3\*</sup>, Shuang Zhao<sup>2,3</sup>, Xinlu Wang<sup>1,2</sup>

4 1. Zhejiang University, Hangzhou, Zhejiang Province, 310058, China

5 2. Key Laboratory of Coastal Environment and Resources of Zhejiang Province, School of  
6 Engineering, Westlake University, Hangzhou, Zhejiang Province, 310024, China

7 3. Institute of Advanced Technology, Westlake Institute for Advanced Study, Hangzhou 310024,  
8 Zhejiang Province, China

9

10 Corresponding Author: Yuzhong Zhang, \*Email: zhangyuzhong@westlake.edu.cn;

11

12 **Text S1. Methane emission signal ( $\Delta R$ ) retrieval**

13 Similar to (Ehret et al. 2022; Irakulis-Loitxate et al. 2022), we derived  $\Delta R$  by comparing the  
14 ratio of band12 and band11 with a reference background without enhanced methane concentrations.

15 The reference background is predicted by multivariate linear regression (MLR) models by pixel.

16 For that, a sliding time window of T (60) dates was set and the patches in the time continuum were

17 extracted (Ehret et al. 2022). To obtain optimal training set of MLR, we firstly introduced an image

18 structural similarity index measure (SSIM) algorithm (Zhou et al. 2004) to discard the n (15) images

19 that were most dissimilar to the date of interest t in the time series. Most of the discarded images

20 contained opaque or circus clouds as shown in Fig. S1. SSIM estimated image distances considering

21 the combination of structure, contrast, and luminance in band11. Band11 is ideal for comparison as

22 it belongs to SWIR range like band12 but the methane absorption is much weaker to present

23 anomalous absorption signal. Then, the proposed LRAD algorithm was deployed to detect and mask

24 the potential artifacts in the SSIM-optimized data continuum. Within the data cube, patches of the

25 past T-n-1 dates were employed to train MLR model and generate band11 and 12 references. If the

26 coefficient of determination ( $R^2$ ) of the MLR was lower than 0.5, the date of interest  $t$  was skipped  
27 and the S2L1C data was classified as cloudy observations. The calculation formular of  $\Delta R$  is shown  
28 as follows:

$$29 \quad \Delta R = \frac{\text{band}_{12}^t / \text{band}_{12}^{\text{ref}}}{\text{band}_{11}^t / \text{band}_{11}^{\text{ref}}}$$

30 Considering that band12 exhibits a significantly higher methane absorption capacity compared  
31 to band11, any pronounced methane emission event would lead to a noticeable reduction in the pixel  
32 values within the  $\Delta R$  range of 0-1. Consequently, we applied a threshold range of [0, 1] to  $\Delta R$  in  
33 order to mask anomalies and then a threshold of the 5th percentile value was applied to  $\Delta R$  in order  
34 to remove background. In the end, we applied a colormap to map the unitless  $\Delta R$  matrix into RGB  
35 imagery, so the input to the plume detection algorithm conforms to the structure of ResNet50 in  
36 order to use ImageNet-based pre-training parameters, and also can provide more hierarchical  
37 features to avoid potential accuracy degradation (Shorten and Khoshgoftaar 2019).

## 38 **Text S2. Emission flux quantification and uncertainty estimation**

39 Emission flux rates ( $Q$ ,  $\text{kg h}^{-1}$ ) are calculated for each detected plume-containing  $\Delta R$  image.  
40 Firstly, we employed the radiative transfer model by (Varon et al. 2021) to convert unitless  $\Delta R$  to  
41 methane column enhancements ( $\text{mol m}^{-2}$ ). Secondly, we manually defined a plume mask based on  
42 the enhancement image. Background enhancement (mean enhancement outside the mask) is  
43 subtracted for pixels in the mask. Finally, the emission flux rate  $Q$  is computed using the integrated  
44 mass enhancement (IME) method (Frankenberg et al. 2016; Varon et al. 2018):

$$45 \quad Q = \frac{\text{IME} \times U_{\text{eff}}}{L} \quad (\text{S1})$$

46 where IME is computed as the sum of methane mass enhancements within the plume mask.  $U_{\text{eff}}$   
47 ( $\text{m s}^{-1}$ ) is the effective wind speed, which is computed based on the GEOS-FP 1 hour average 10-m

48 wind speed  $U_{10}$  following the calibration equation developed in (Varon et al. 2021).  $L$  (m) is the  
49 plume length which is computed as the square root of the plume area.

50 To estimate the uncertainty for the emission flux rate, we consider three dominant error terms  
51 in Eqs. (S1). The random error of IME, mainly originated from retrieval noise, is estimated as the  
52 standard deviation of methane column mass enhancement outside the plume mask (Cusworth et al.  
53 2020). The error of GEOS-FP  $U_{10}$  is assumed to be 50%, consistent with the  $\sim 1.5 \text{ m s}^{-1}$  standard  
54 deviation given by (Varon et al. 2020). Following (Sánchez-García et al. 2022), an error of 0.01 is  
55 assumed for both the slope and intercept of the  $U_{eff}$  calibration function. We add the above errors  
56 in quadrature to derive the total uncertainty ( $1\sigma$ ) of the emission flux.

### 57 **Text S3. Labeling decision rule of $\Delta R$ imagery**

58 We categorized the  $\Delta R$  images into two classes, plume-containing and plume-free, following  
59 the procedure in Fig. 5. The determination is mainly based on visual inspection of  $\Delta R$  images. We  
60 first look for the presence of methane plumes in  $\Delta R$  images. If present, we then examine whether  
61 the potential methane plume signal is roughly aligned with wind direction and is free from surface  
62 and cloud interference. We use Goddard Earth Observing System-Fast Processing (GEOS-FP) 10  
63 m wind reanalysis data as main information of wind direction (Varon et al. 2020). Since we find that  
64 the wind direction in the GEOS-FP 10-m wind data often does not align with the plume direction,  
65 the difference between plume and wind direction tolerated by this labeling process is less than  $90^\circ$ .  
66 Nonetheless, there are still a few cases where the plume morphology is distinct but the difference in  
67 wind direction is greater than  $90^\circ$ . To this end, the visual inspection of plume is supplemented by  
68 directions of nearby smoke plumes (if available) seen in RGB images. Subsequently, we use SWIR  
69 and RGB images to rule out potential interference by surface and cloud. It is noted that artifacts

70 originate from low reflectivity surface features, so we focus on the least reflective pixels in the  
71 SWIR images. If the “plume” morphology in  $\Delta R$  image presents to be the low-reflectivity region in  
72 SWIR images, then we discriminate it as a false signal.

73

74 **Figures**

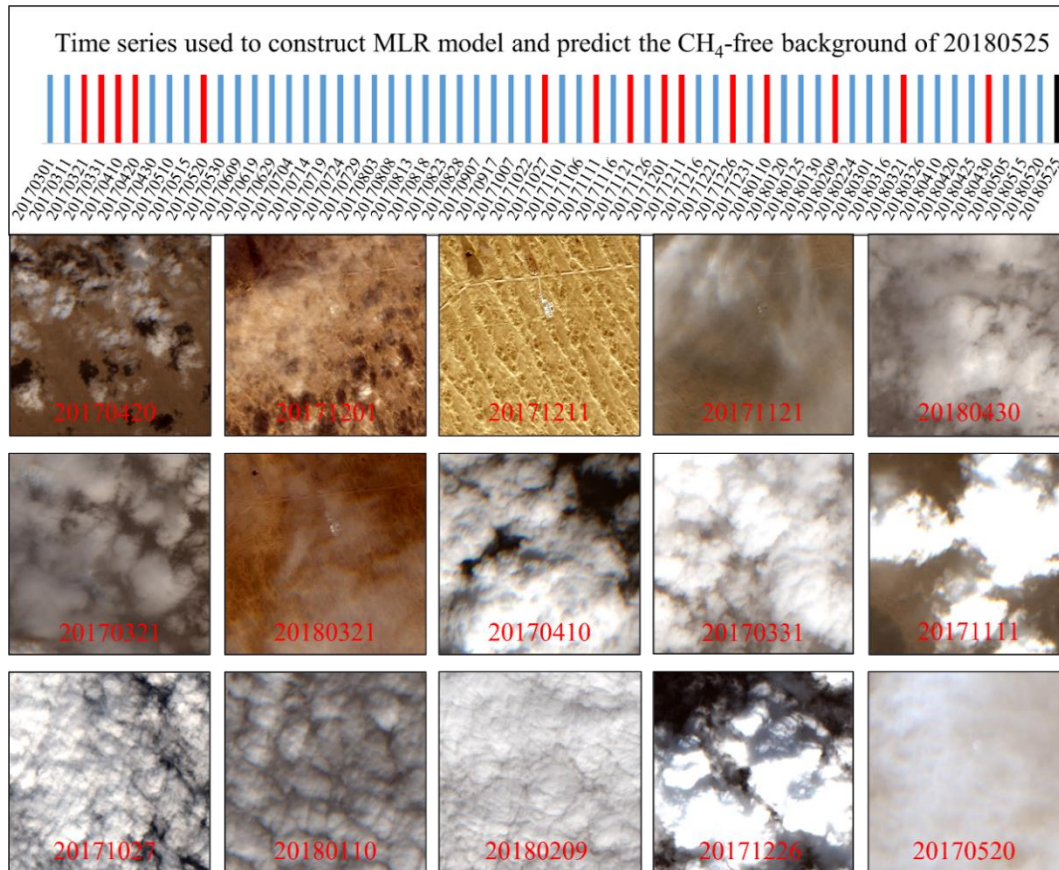

75

76 **Fig. S1.** RGB images of the S2L1C observations discarded by SSIM (take 20180525 as an example)

77

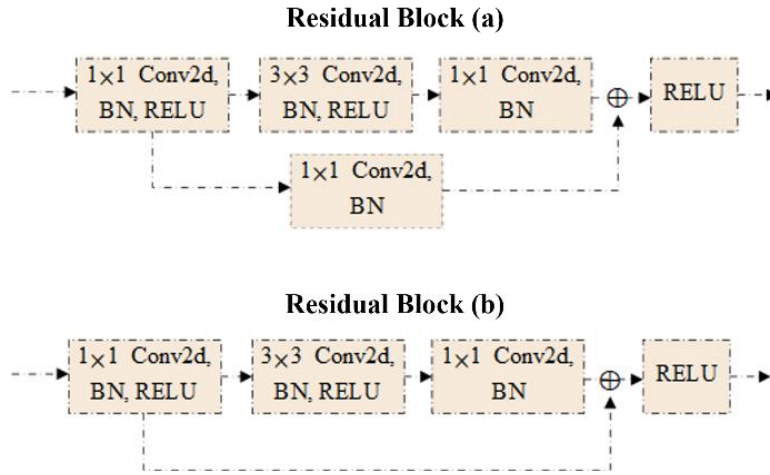

Fig. S2. Architecture of residual blocks in DSAN.

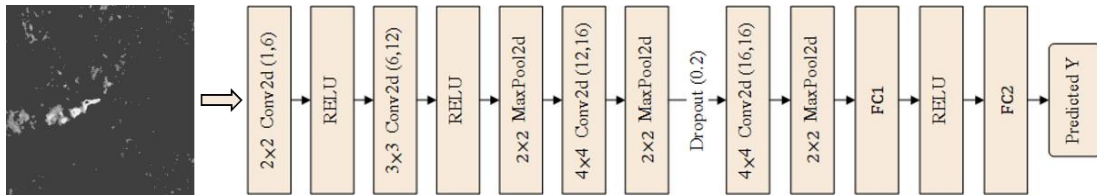

Fig. S3. Architecture of MethaNet proposed by (Jongaramrungruang et al. 2022).

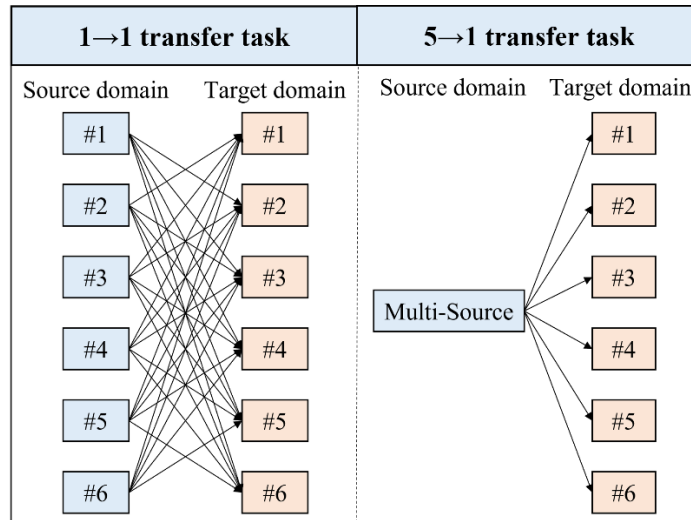

Fig. S4. Models were trained and assessed on two kinds of transfer tasks. “1→1”: single source domain to single-target domain and “5→1”: multi-source domain to single-target domain (multi-source domain is a fusion of all the datasets except for the target dataset).

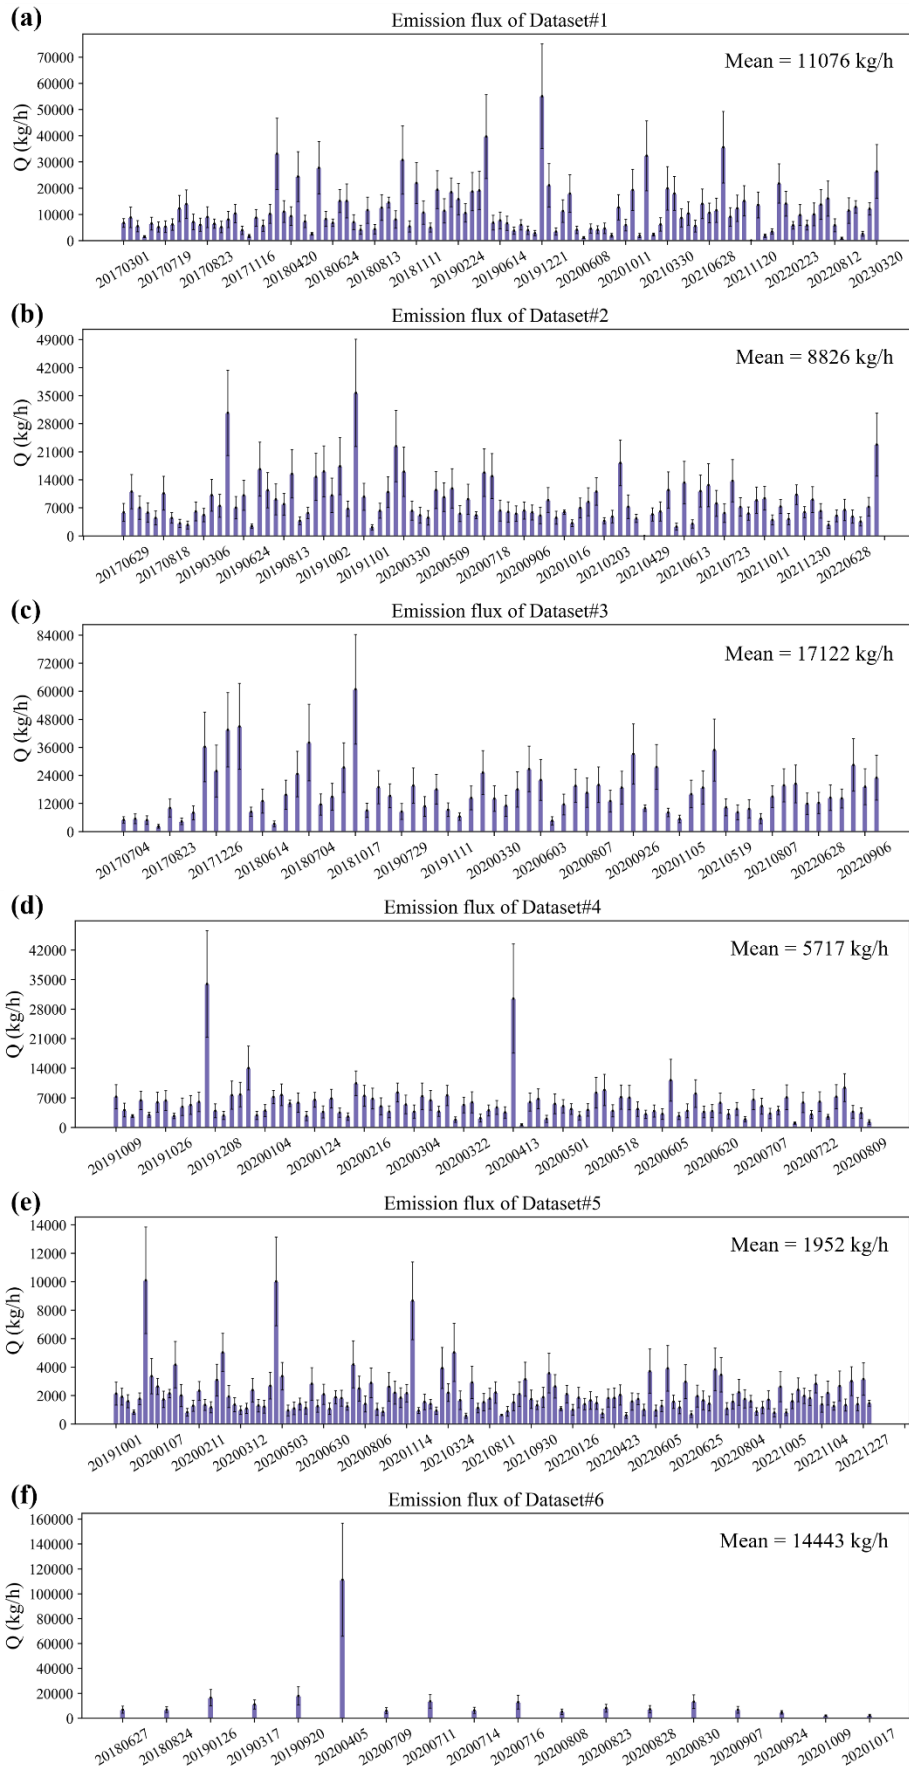

87

88 **Fig. S5.** Emission flux (kg/h) and uncertainty quantification of the methane plumes in Dataset#1-6

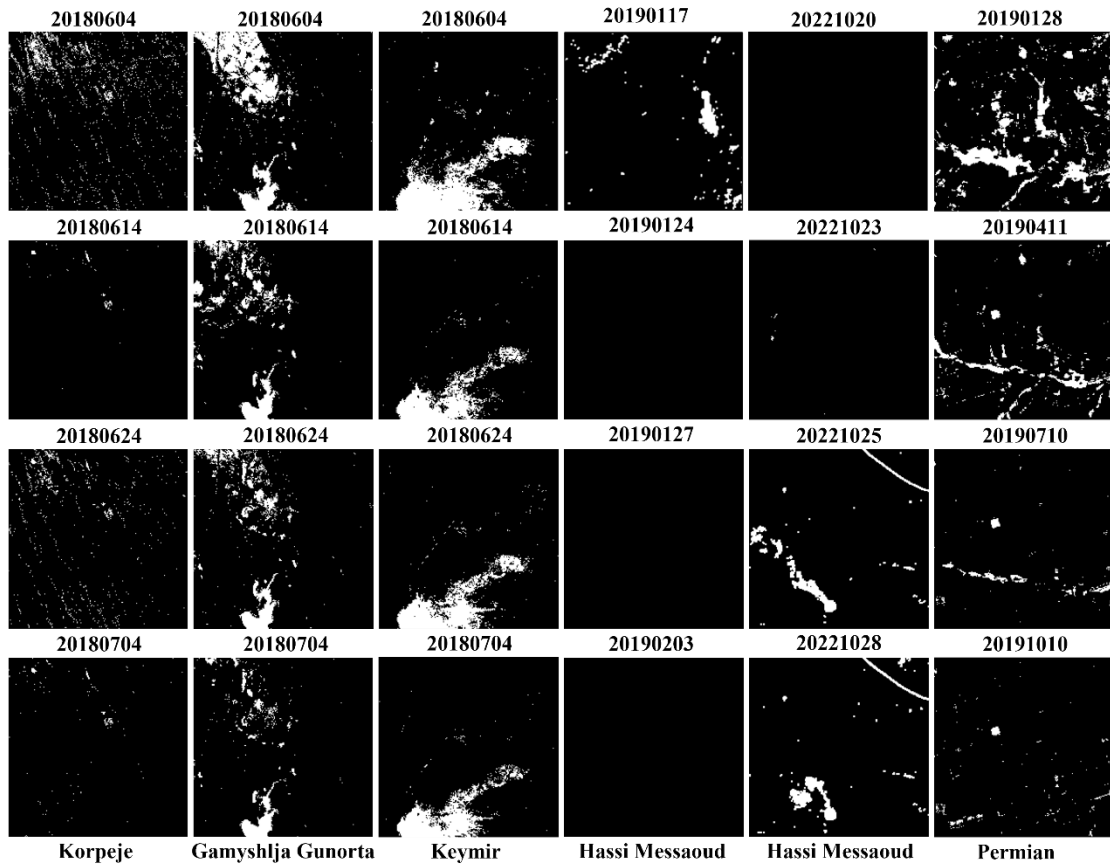

90

91 **Fig. S6.** Examples of the adaptive denoising masks over the six methane point sources generated by  
 92 the LRAD algorithm. White color represents pixels that are filtered out as artifacts.

93

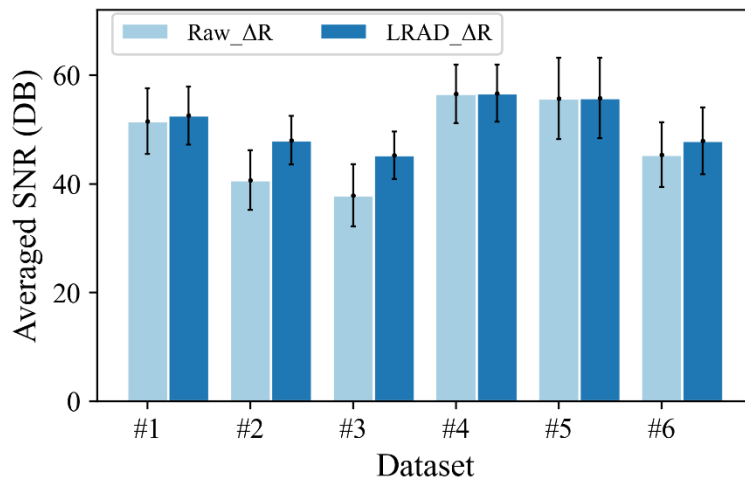

94

95 **Fig. S7.** Comparison of the averaged signal-to-noise ratios (SNRs) of the six  $\Delta R$  datasets before and  
 96 after deploying the LRAD algorithm.

97

98

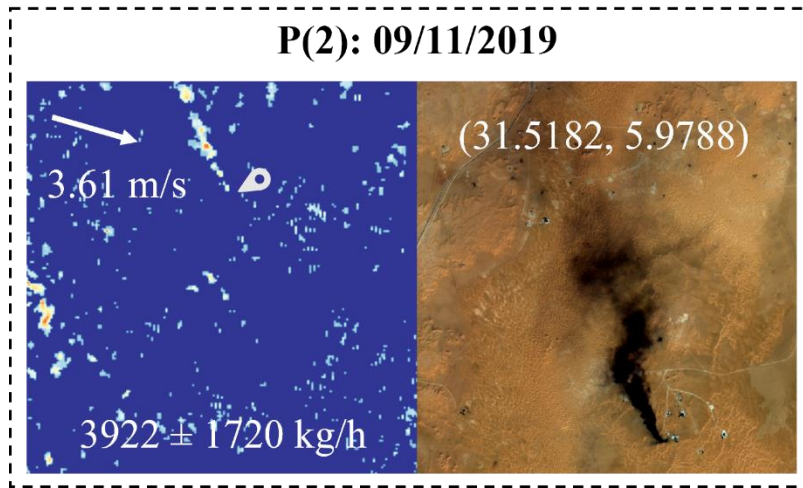

99

100 **Fig. S8.** False negative detection in source P(2), and the corresponding RGB images extracted from

101 Sentinel-2 L1C product.

102

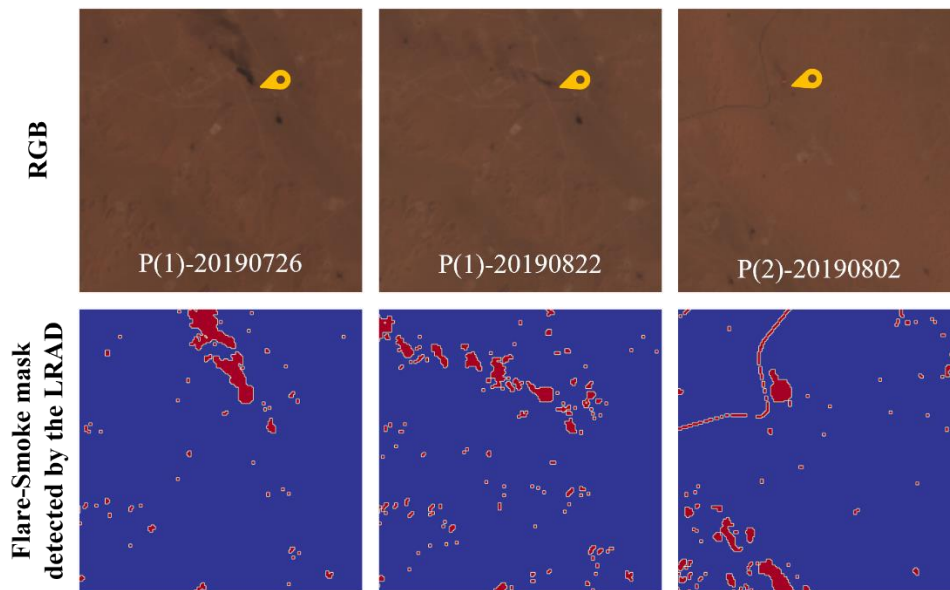

103

104 **Fig. S9.** Top row shows RGB images of flaring at P(1) and P(2), which are extracted from Sentinel-

105 2 L1C product. Bottom row presents the flare and smoke (red pixels) masks detected by the LRAD

106 algorithm. Yellow pins indicate the locations of flaring facilities.

107



109 **Table S1** Performances of MethaNet, ResNet-50, and DSAN models on test sets of the ‘1→1’  
110 transfer tasks.

| Task # | Class   | MethaNet  |        |          | ResNet-50 |        |          | DSAN      |        |          |
|--------|---------|-----------|--------|----------|-----------|--------|----------|-----------|--------|----------|
|        |         | Precision | Recall | Accuracy | Precision | Recall | Accuracy | Precision | Recall | Accuracy |
| 1-2    | contain | 0.74      | 0.55   | 0.76     | 0.70      | 0.80   | 0.80     | 0.80      | 0.86   | 0.87     |
|        | free    | 0.77      | 0.89   |          | 0.87      | 0.80   |          | 0.92      | 0.87   |          |
| 1-3    | contain | 0.85      | 0.59   | 0.87     | 0.64      | 0.89   | 0.84     | 0.76      | 0.97   | 0.91     |
|        | free    | 0.87      | 0.96   |          | 0.96      | 0.83   |          | 0.99      | 0.89   |          |
| 1-4    | contain | 0.78      | 0.71   | 0.86     | 0.71      | 0.92   | 0.87     | 0.81      | 0.95   | 0.92     |
|        | free    | 0.89      | 0.92   |          | 0.97      | 0.85   |          | 0.98      | 0.91   |          |
| 1-5    | contain | 0.76      | 0.20   | 0.65     | 0.78      | 0.78   | 0.81     | 0.86      | 0.87   | 0.89     |
|        | free    | 0.64      | 0.96   |          | 0.84      | 0.84   |          | 0.90      | 0.90   |          |
| 1-6    | contain | 0.36      | 0.50   | 0.90     | 0.19      | 0.71   | 0.77     | 0.36      | 0.67   | 0.89     |
|        | free    | 0.96      | 0.93   |          | 0.97      | 0.77   |          | 0.97      | 0.91   |          |
| 2-1    | contain | 0.74      | 0.84   | 0.80     | 0.80      | 0.82   | 0.83     | 0.93      | 0.90   | 0.93     |
|        | free    | 0.86      | 0.76   |          | 0.85      | 0.83   |          | 0.92      | 0.95   |          |
| 2-3    | contain | 0.78      | 0.59   | 0.85     | 0.57      | 0.92   | 0.80     | 0.82      | 0.91   | 0.92     |
|        | free    | 0.87      | 0.94   |          | 0.97      | 0.75   |          | 0.97      | 0.93   |          |
| 2-4    | contain | 0.87      | 0.73   | 0.89     | 0.77      | 0.92   | 0.90     | 0.84      | 0.90   | 0.92     |
|        | free    | 0.90      | 0.96   |          | 0.97      | 0.89   |          | 0.96      | 0.93   |          |
| 2-5    | contain | 0.86      | 0.15   | 0.65     | 0.80      | 0.80   | 0.83     | 0.88      | 0.81   | 0.87     |
|        | free    | 0.63      | 0.98   |          | 0.85      | 0.85   |          | 0.87      | 0.92   |          |
| 2-6    | contain | 0.38      | 0.28   | 0.91     | 0.18      | 0.71   | 0.75     | 0.45      | 0.72   | 0.91     |
|        | free    | 0.94      | 0.96   |          | 0.97      | 0.76   |          | 0.98      | 0.93   |          |
| 3-1    | contain | 0.87      | 0.77   | 0.84     | 0.82      | 0.91   | 0.87     | 0.97      | 0.85   | 0.92     |
|        | free    | 0.83      | 0.90   |          | 0.92      | 0.83   |          | 0.89      | 0.98   |          |
| 3-2    | contain | 0.84      | 0.57   | 0.80     | 0.68      | 0.79   | 0.79     | 0.81      | 0.83   | 0.87     |
|        | free    | 0.79      | 0.94   |          | 0.87      | 0.79   |          | 0.90      | 0.89   |          |
| 3-4    | contain | 0.94      | 0.64   | 0.88     | 0.63      | 0.92   | 0.83     | 0.88      | 0.92   | 0.94     |
|        | free    | 0.87      | 0.98   |          | 0.96      | 0.79   |          | 0.97      | 0.95   |          |
| 3-5    | contain | 0.77      | 0.30   | 0.68     | 0.77      | 0.76   | 0.81     | 0.91      | 0.81   | 0.88     |
|        | free    | 0.66      | 0.94   |          | 0.83      | 0.84   |          | 0.87      | 0.94   |          |
| 3-6    | contain | 0.45      | 0.56   | 0.92     | 0.24      | 0.76   | 0.81     | 0.55      | 0.67   | 0.93     |
|        | free    | 0.96      | 0.95   |          | 0.98      | 0.81   |          | 0.97      | 0.95   |          |
| 4-1    | contain | 0.85      | 0.78   | 0.84     | 0.87      | 0.94   | 0.91     | 0.94      | 0.84   | 0.90     |
|        | free    | 0.83      | 0.89   |          | 0.94      | 0.89   |          | 0.88      | 0.95   |          |
| 4-2    | contain | 0.55      | 0.84   | 0.69     | 0.68      | 0.76   | 0.78     | 0.75      | 0.83   | 0.83     |
|        | free    | 0.87      | 0.60   |          | 0.85      | 0.79   |          | 0.90      | 0.84   |          |
| 4-3    | contain | 0.66      | 0.73   | 0.83     | 0.68      | 0.85   | 0.86     | 0.85      | 0.76   | 0.90     |
|        | free    | 0.90      | 0.87   |          | 0.94      | 0.86   |          | 0.92      | 0.95   |          |
| 4-5    | contain | 0.64      | 0.22   | 0.62     | 0.83      | 0.72   | 0.82     | 0.91      | 0.78   | 0.88     |

|     |         |      |      |      |      |      |      |      |      |      |
|-----|---------|------|------|------|------|------|------|------|------|------|
| 4-6 | free    | 0.62 | 0.91 | 0.89 | 0.82 | 0.89 | 0.79 | 0.86 | 0.94 | 0.93 |
|     | contain | 0.33 | 0.44 |      | 0.21 | 0.71 |      | 0.53 | 0.56 |      |
|     | free    | 0.95 | 0.93 |      | 0.97 | 0.80 |      | 0.96 | 0.96 |      |
| 5-1 | contain | 0.64 | 0.81 | 0.71 | 0.85 | 0.92 | 0.89 | 0.91 | 0.94 | 0.93 |
|     | free    | 0.80 | 0.63 |      | 0.93 | 0.86 |      | 0.95 | 0.92 |      |
| 5-2 | contain | 0.49 | 0.79 | 0.63 | 0.62 | 0.84 | 0.76 | 0.75 | 0.89 | 0.85 |
|     | free    | 0.81 | 0.53 |      | 0.89 | 0.71 |      | 0.93 | 0.83 |      |
| 5-3 | contain | 0.53 | 0.70 | 0.76 | 0.62 | 0.94 | 0.83 | 0.79 | 0.92 | 0.92 |
|     | free    | 0.88 | 0.78 |      | 0.97 | 0.80 |      | 0.97 | 0.91 |      |
| 5-4 | contain | 0.48 | 0.84 | 0.70 | 0.73 | 0.90 | 0.88 | 0.80 | 0.94 | 0.91 |
|     | free    | 0.91 | 0.64 |      | 0.96 | 0.87 |      | 0.97 | 0.91 |      |
| 5-6 | contain | 0.17 | 0.61 | 0.75 | 0.29 | 0.82 | 0.85 | 0.33 | 0.72 | 0.87 |
|     | free    | 0.96 | 0.76 |      | 0.98 | 0.85 |      | 0.98 | 0.88 |      |
| 6-1 | contain | 0.88 | 0.53 | 0.76 | 0.88 | 0.56 | 0.77 | 0.99 | 0.67 | 0.85 |
|     | free    | 0.71 | 0.94 |      | 0.73 | 0.94 |      | 0.79 | 0.99 |      |
| 6-2 | contain | 0.52 | 0.53 | 0.64 | 0.73 | 0.40 | 0.73 | 0.82 | 0.61 | 0.81 |
|     | free    | 0.72 | 0.71 |      | 0.73 | 0.91 |      | 0.80 | 0.92 |      |
| 6-3 | contain | 0.84 | 0.24 | 0.79 | 0.75 | 0.37 | 0.80 | 0.90 | 0.67 | 0.89 |
|     | free    | 0.79 | 0.98 |      | 0.81 | 0.96 |      | 0.89 | 0.97 |      |
| 6-4 | contain | 0.94 | 0.34 | 0.81 | 0.90 | 0.65 | 0.88 | 0.96 | 0.84 | 0.94 |
|     | free    | 0.79 | 0.99 |      | 0.88 | 0.97 |      | 0.94 | 0.99 |      |
| 6-5 | contain | 0.96 | 0.18 | 0.67 | 0.90 | 0.48 | 0.76 | 0.97 | 0.55 | 0.81 |
|     | free    | 0.64 | 0.99 |      | 0.72 | 0.96 |      | 0.75 | 0.99 |      |

111

112 **Table S2** Performances of the MethaNet and ResNet-50 on test sets (30%) on validation sets of  
113 the non-transfer tasks.

| Dataset# | Class   | MethaNet  |        |          | ResNet-50 |        |          |
|----------|---------|-----------|--------|----------|-----------|--------|----------|
|          |         | Precision | Recall | Accuracy | Precision | Recall | Accuracy |
| 1        | contain | 0.80      | 0.95   | 0.88     | 0.97      | 1.00   | 0.99     |
|          | free    | 0.96      | 0.82   |          | 1.00      | 0.98   |          |
| 2        | contain | 0.76      | 0.72   | 0.83     | 0.85      | 1.00   | 0.94     |
|          | free    | 0.86      | 0.88   |          | 1.00      | 0.90   |          |
| 3        | contain | 1.00      | 0.67   | 0.90     | 0.83      | 0.95   | 0.93     |
|          | free    | 0.88      | 1.00   |          | 0.98      | 0.93   |          |
| 4        | contain | 0.95      | 0.87   | 0.94     | 0.90      | 1.00   | 0.97     |
|          | free    | 0.93      | 0.98   |          | 1.00      | 0.96   |          |
| 5        | contain | 0.81      | 0.75   | 0.81     | 0.95      | 0.92   | 0.95     |
|          | free    | 0.81      | 0.85   |          | 0.95      | 0.96   |          |
| 6        | contain | 1.00      | 0.80   | 0.98     | 0.83      | 1.00   | 0.99     |
|          | free    | 0.98      | 1.00   |          | 1.00      | 0.99   |          |

114

115 **Table S3** Performances of MethaNet, ResNet-50, and DSAN models on test sets of the ‘5→1’  
116 transfer tasks.

| Task# | Class | MethaNet | ResNet-50 | DSAN |
|-------|-------|----------|-----------|------|
|-------|-------|----------|-----------|------|

|   |         | Precisi<br>on | Reca<br>ll | Accu<br>racy | Preci<br>sion | Reca<br>ll | Accu<br>racy | Preci<br>sion | Reca<br>ll | Accu<br>racy |
|---|---------|---------------|------------|--------------|---------------|------------|--------------|---------------|------------|--------------|
| 1 | contain | 0.79          | 0.87       | 0.84         | 0.83          | 0.93       | 0.88         | 0.93          | 0.92       | 0.93         |
|   | free    | 0.89          | 0.81       |              | 0.93          | 0.84       |              | 0.93          | 0.94       |              |
| 2 | contain | 0.79          | 0.68       | 0.82         | 0.72          | 0.83       | 0.82         | 0.82          | 0.85       | 0.88         |
|   | free    | 0.83          | 0.90       |              | 0.89          | 0.81       |              | 0.91          | 0.89       |              |
| 3 | contain | 0.84          | 0.71       | 0.89         | 0.68          | 0.83       | 0.85         | 0.89          | 0.94       | 0.95         |
|   | free    | 0.90          | 0.95       |              | 0.94          | 0.86       |              | 0.98          | 0.96       |              |
| 4 | contain | 0.89          | 0.85       | 0.93         | 0.80          | 0.96       | 0.92         | 0.89          | 0.92       | 0.94         |
|   | free    | 0.94          | 0.96       |              | 0.98          | 0.91       |              | 0.97          | 0.95       |              |
| 5 | contain | 0.74          | 0.15       | 0.62         | 0.86          | 0.74       | 0.84         | 0.95          | 0.81       | 0.90         |
|   | free    | 0.61          | 0.96       |              | 0.83          | 0.92       |              | 0.87          | 0.97       |              |
| 6 | contain | 0.35          | 0.50       | 0.89         | 0.22          | 0.71       | 0.80         | 0.47          | 0.78       | 0.92         |
|   | free    | 0.96          | 0.92       |              | 0.97          | 0.81       |              | 0.98          | 0.93       |              |

117

118

119

## References

120

Cusworth, D.H., Duren, R.M., Thorpe, A.K., Tseng, E., Thompson, D., Guha, A., Newman, S., Foster, K.T., & Miller, C.E. (2020). Using remote sensing to detect, validate, and quantify methane emissions from California solid waste operations. *Environmental Research Letters*, 15, 054012

123

Ehret, T., De Truchis, A., Mazzolini, M., Morel, J.-M., d'Aspremont, A., Lauvaux, T., Duren, R., Cusworth, D., & Facciolo, G. (2022). Global Tracking and Quantification of Oil and Gas Methane Emissions from Recurrent Sentinel-2 Imagery. *Environmental Science & Technology*, 56, 10517-10529

126

Frankenberg, C., Thorpe, A.K., Thompson, D.R., Hulley, G., Kort, E.A., Vance, N., Borchardt, J., Krings, T., Gerilowski, K., Sweeney, C., Conley, S., Bue, B.D., Aubrey, A.D., Hook, S., & Green, R.O. (2016). Airborne methane remote measurements reveal heavy-tail flux distribution in Four Corners region. *Proceedings of the National Academy of Sciences*, 113, 9734-9739

130

Irakulis-Loitxate, I., Guanter, L., Maasackers, J.D., Zavala-Araiza, D., & Aben, I. (2022). Satellites Detect Abatable Super-Emissions in One of the World's Largest Methane Hotspot Regions. *Environmental Science & Technology*, 56, 2143-2152

133

Sánchez-García, E., Gorroño, J., Irakulis-Loitxate, I., Varon, D.J., & Guanter, L. (2022). Mapping methane plumes at very high spatial resolution with the WorldView-3 satellite. *Atmos. Meas. Tech.*, 15, 1657-1674

136

Shorten, C., & Khoshgoftaar, T.M. (2019). A survey on Image Data Augmentation for Deep Learning. *Journal of Big Data*, 6, 60

138

Varon, D.J., Jacob, D.J., Jervis, D., & McKeever, J. (2020). Quantifying Time-Averaged Methane Emissions from Individual Coal Mine Vents with GHGSat-D Satellite Observations. *Environmental Science & Technology*, 54, 10246-10253

141

Varon, D.J., Jacob, D.J., McKeever, J., Jervis, D., Durak, B.O.A., Xia, Y., & Huang, Y. (2018). Quantifying methane point sources from fine-scale satellite observations of atmospheric methane plumes. *Atmos. Meas. Tech.*, 11, 5673-5686

144

Varon, D.J., Jervis, D., McKeever, J., Spence, I., Gains, D., & Jacob, D.J. (2021). High-frequency monitoring of anomalous methane point sources with multispectral Sentinel-2 satellite observations.

146

*Atmos. Meas. Tech.*, 14, 2771-2785

147 Zhou, W., Bovik, A.C., Sheikh, H.R., & Simoncelli, E.P. (2004). Image quality assessment: from error  
148 visibility to structural similarity. *IEEE Transactions on Image Processing*, 13, 600-612  
149  
150
